# Supplementary material for: TROAP regulates cell cycle and promotes tumor progression through Wnt/β‐Catenin signaling pathway in glioma cells
Source: PubMed Central journal article supplement (PMC8339535; doi:10.1111/cns.13688), 2021-06-02

Figure 1 (I)

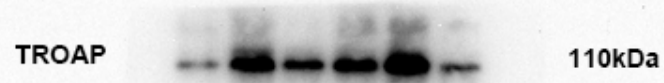

Figure1 (I)

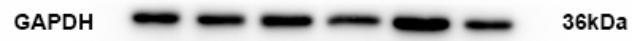

Figure1 (G)

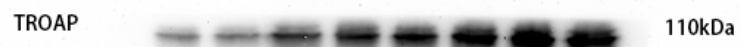

GAPDH 36kDa

Figure3(A)

TROAP 110kDa

Figure3A

GAPDH 36kDa

Figure3B

TROAP 110kDa

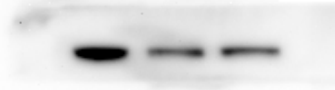

Figure3B

GAPDH 36kDa

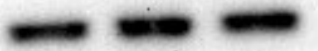

Figure3C

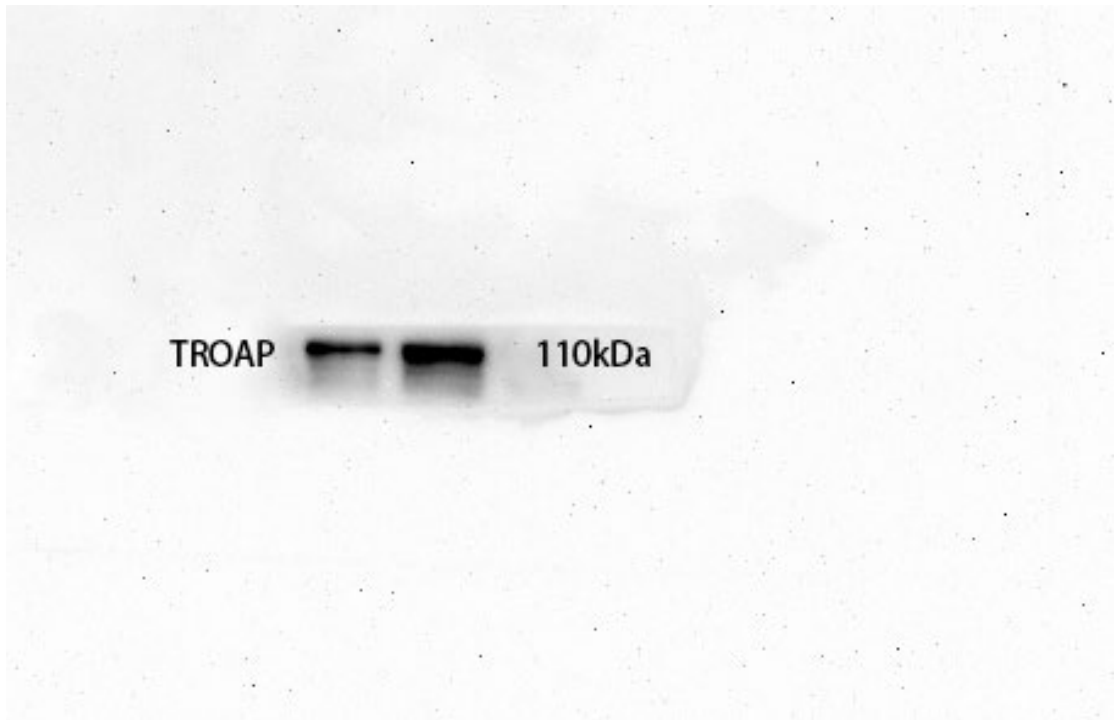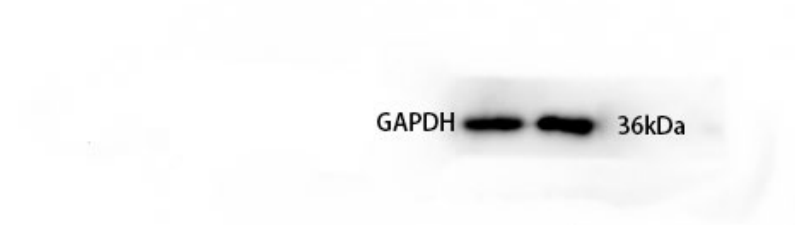

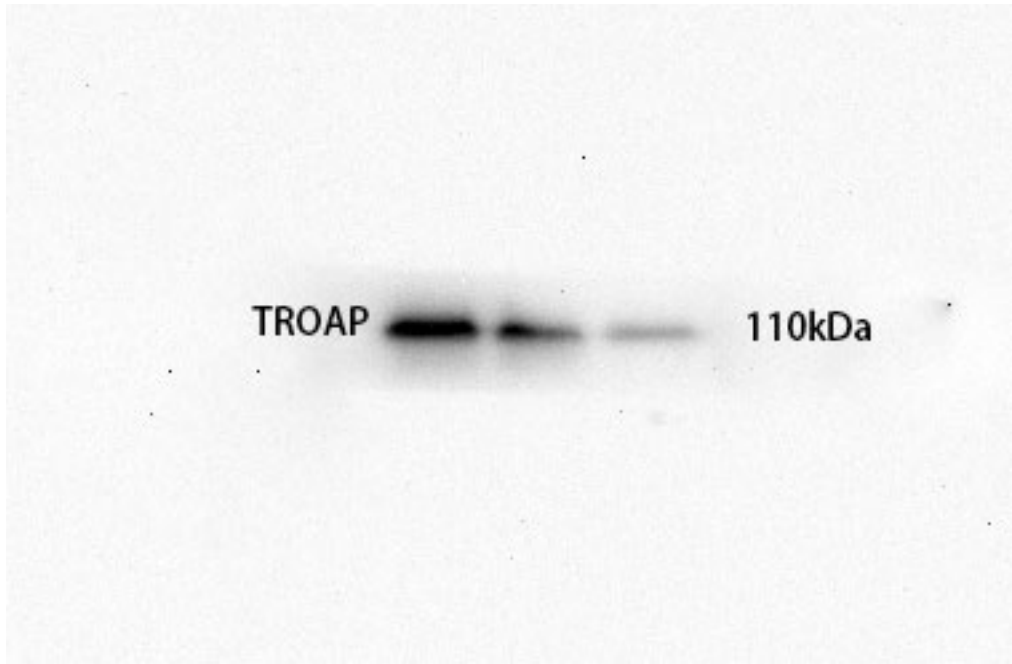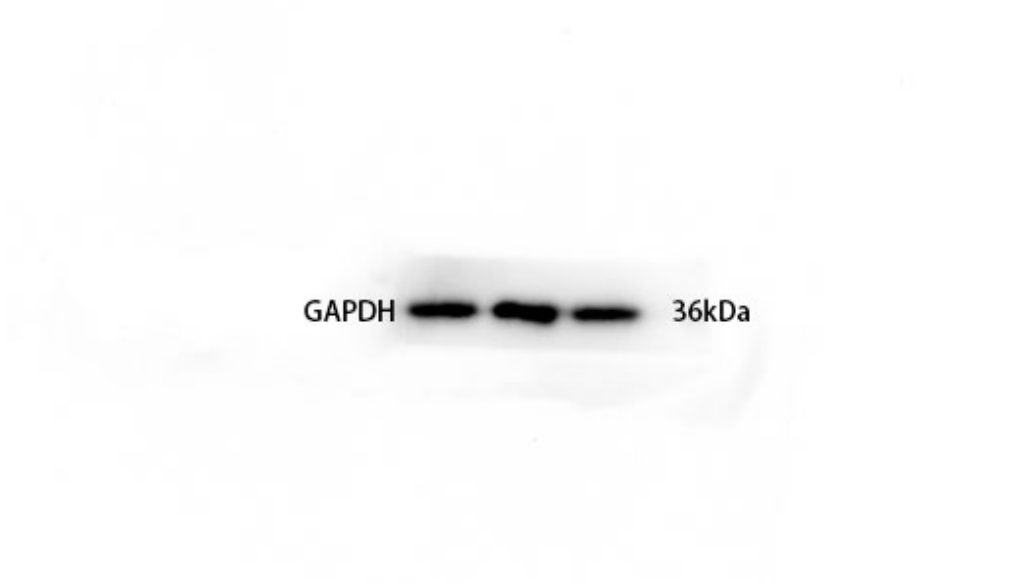

Figure4E

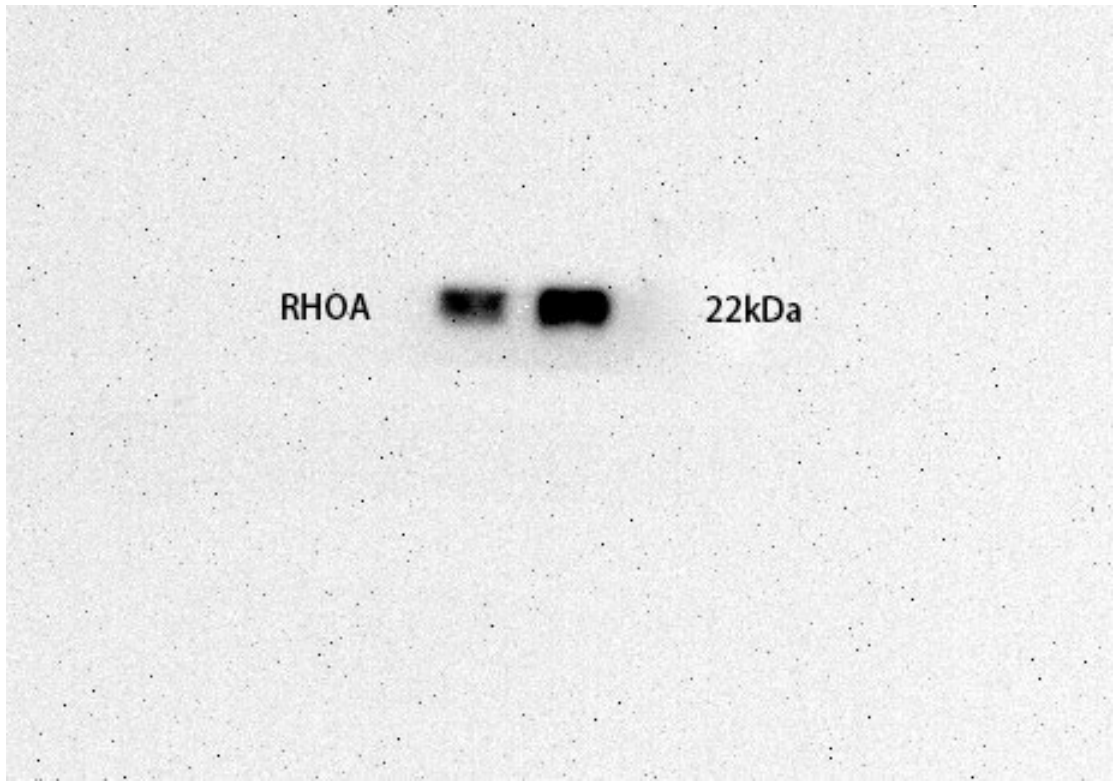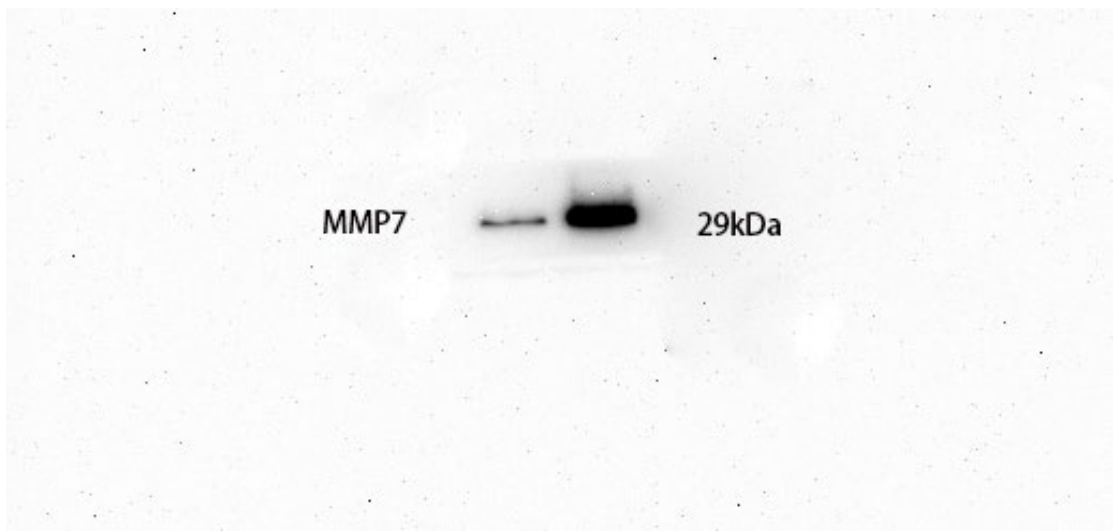

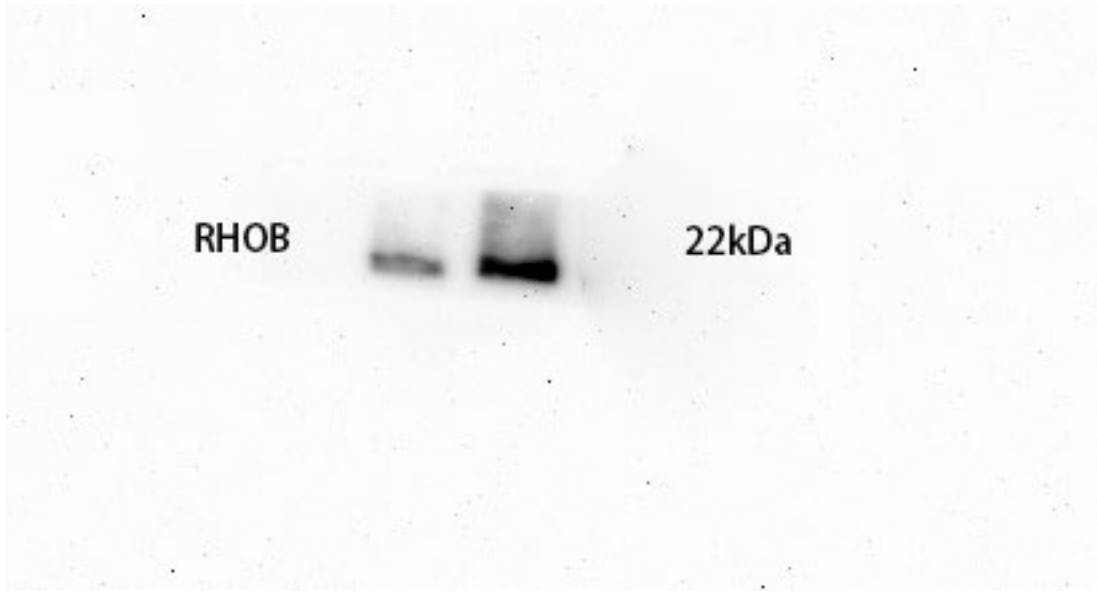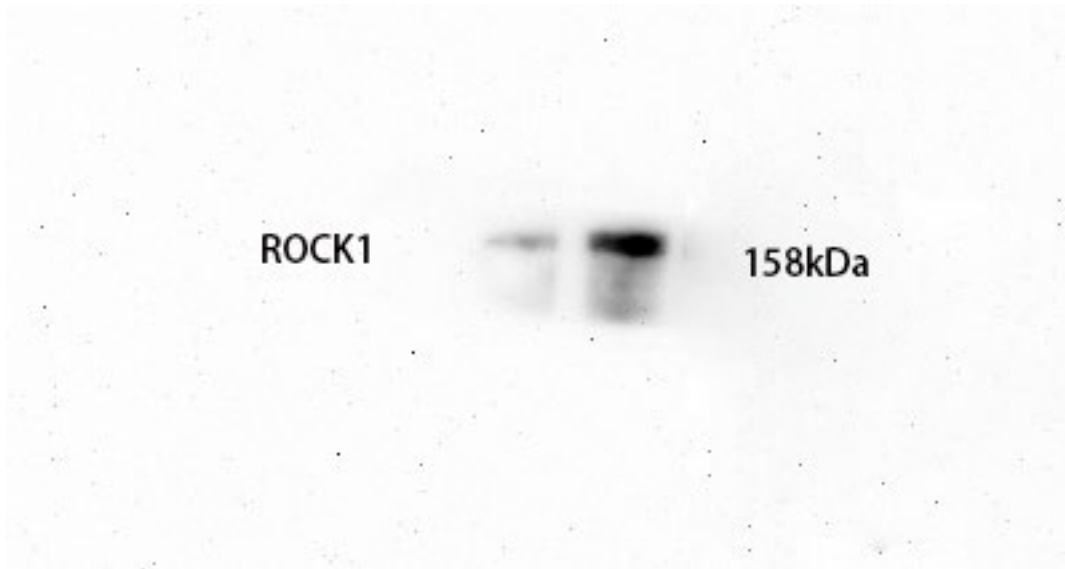

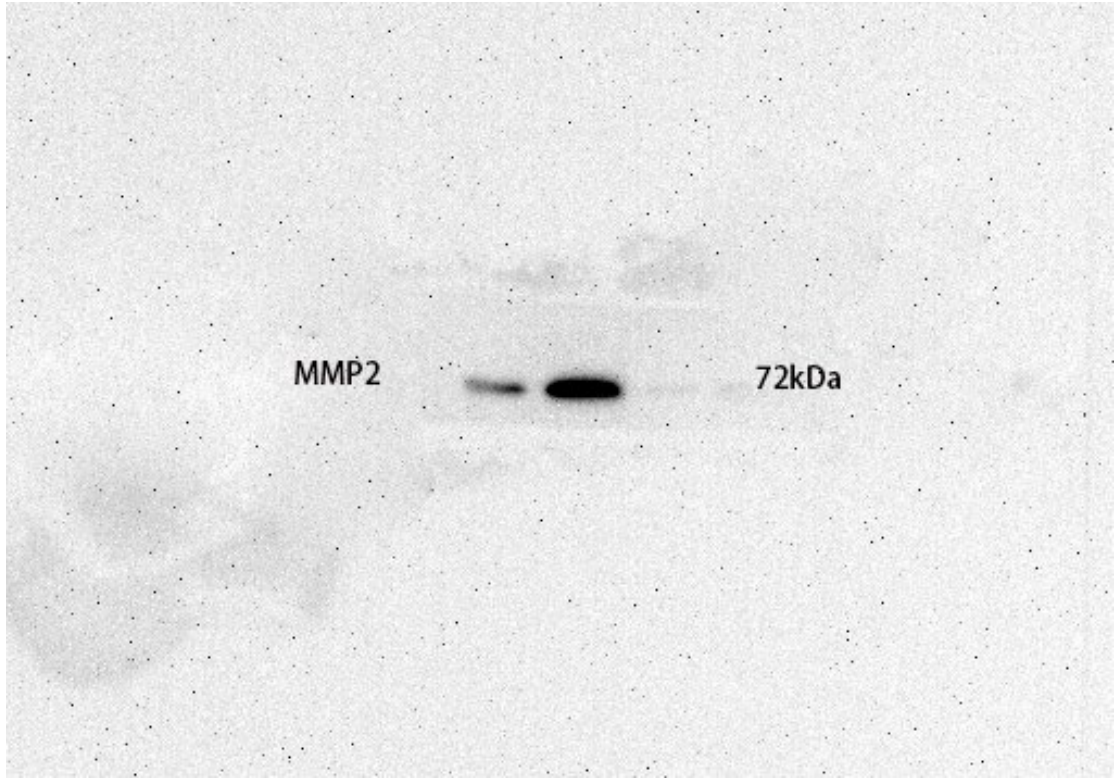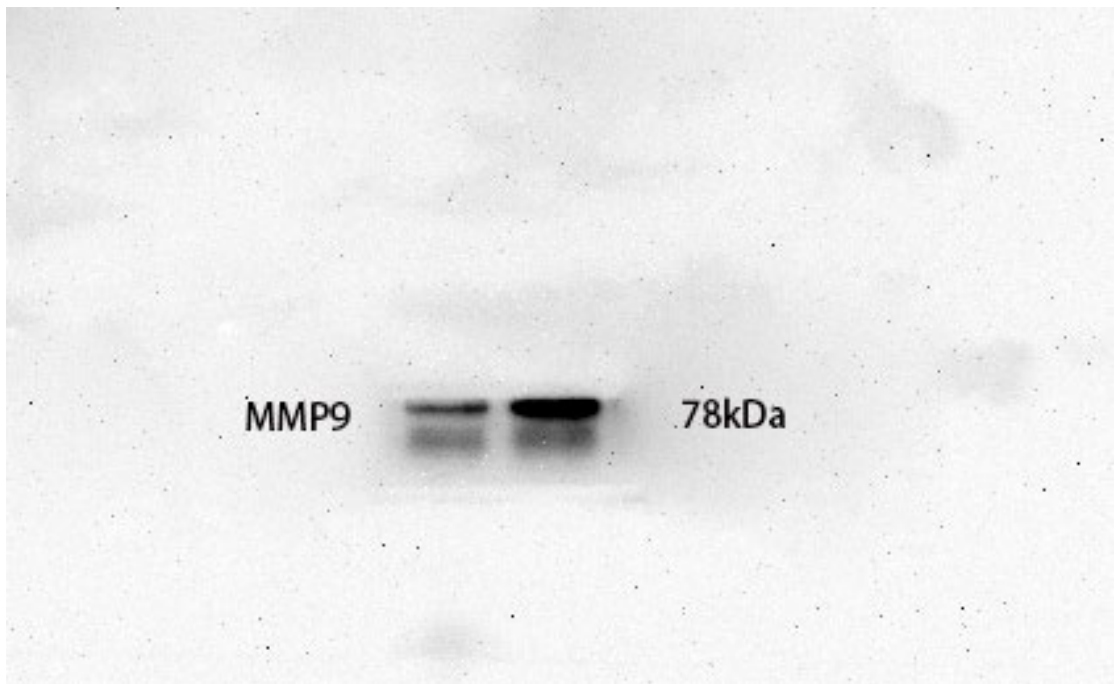



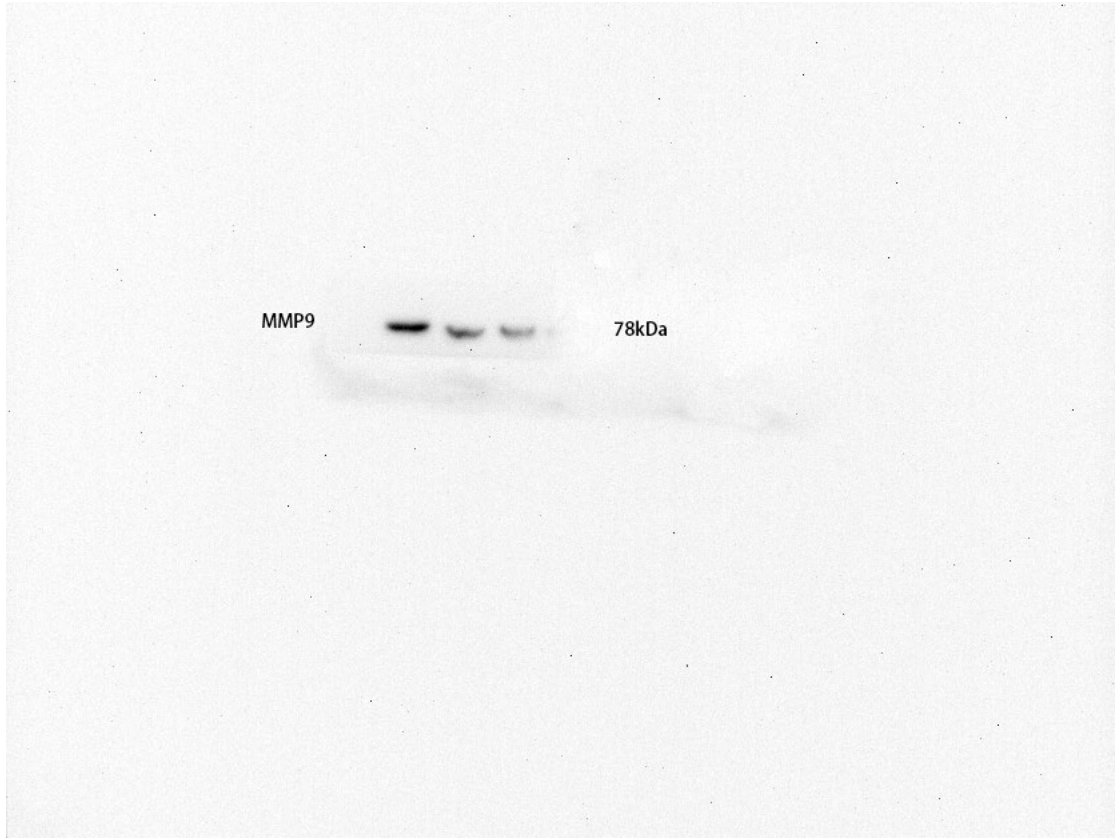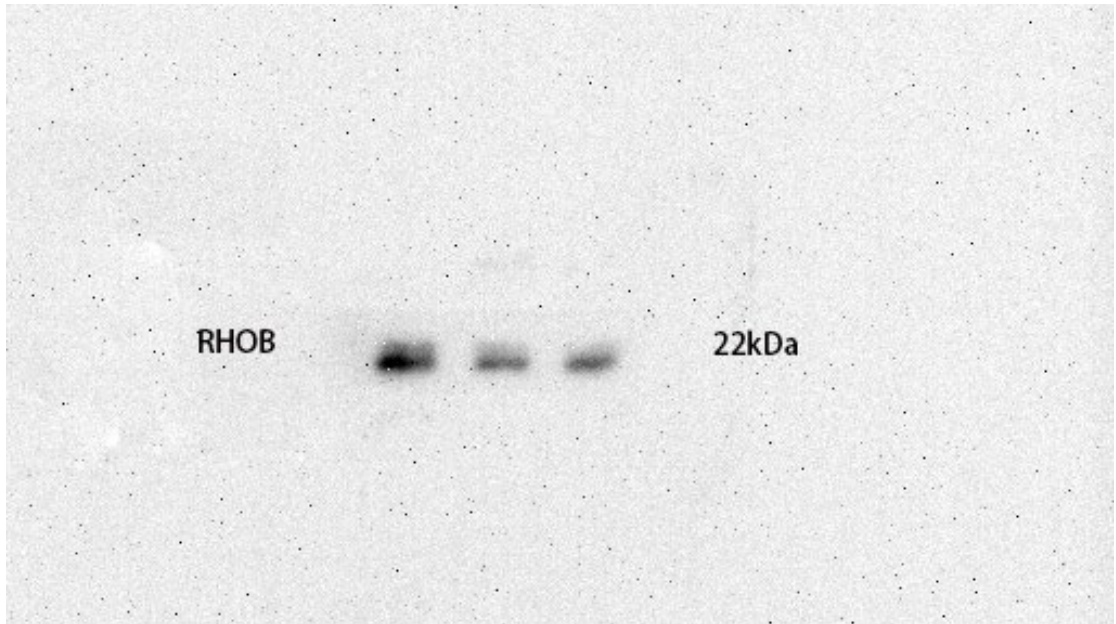

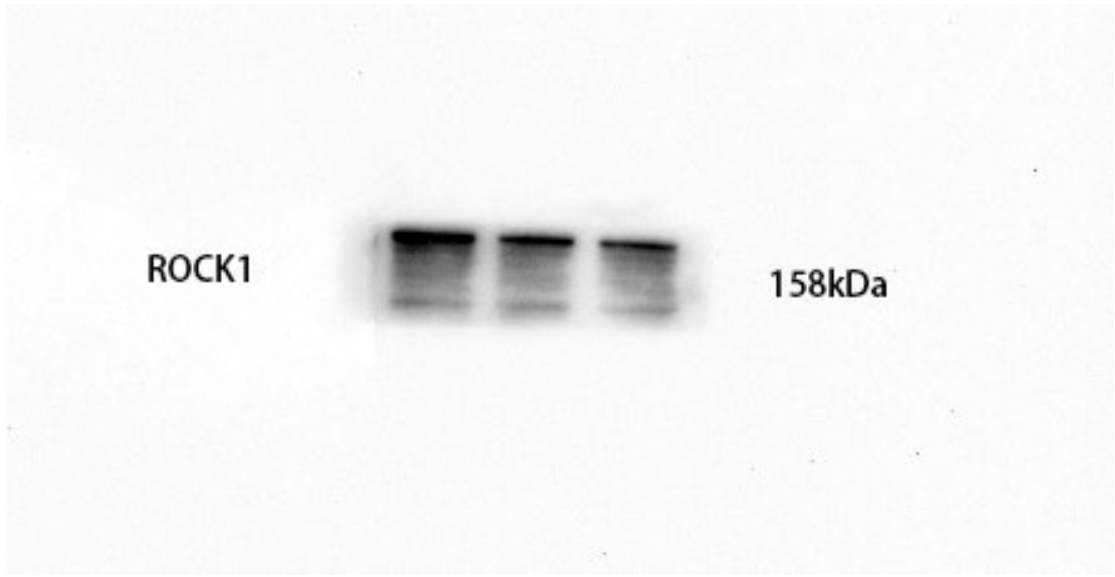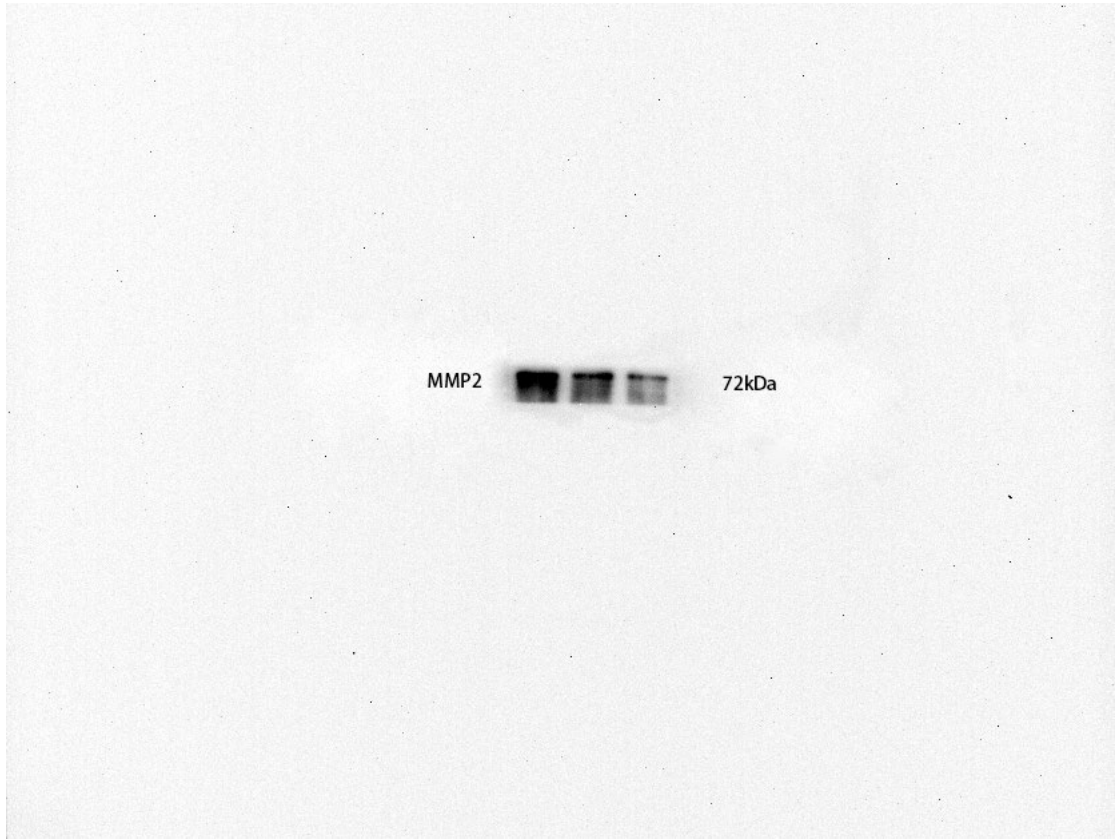

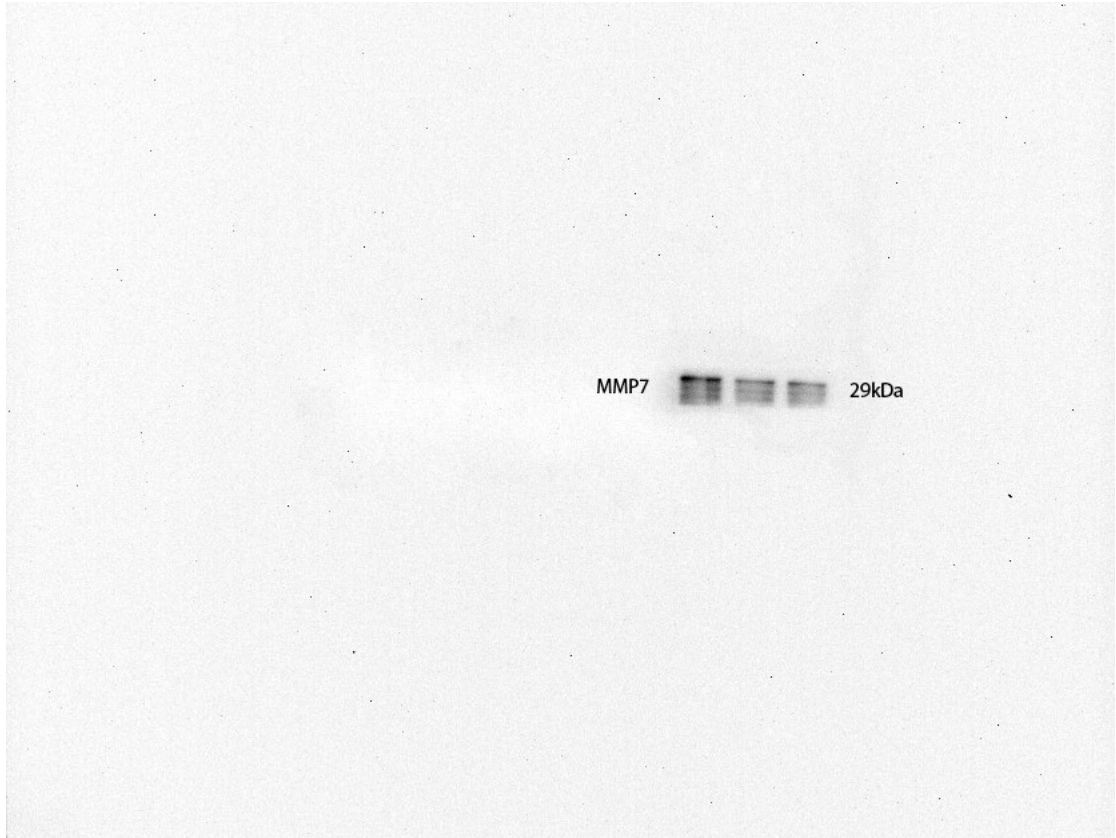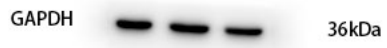

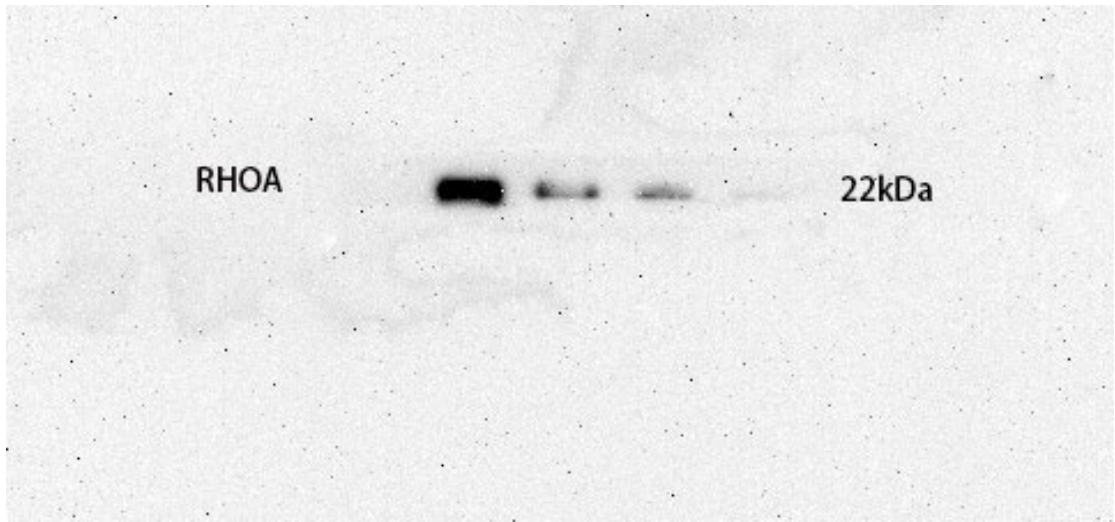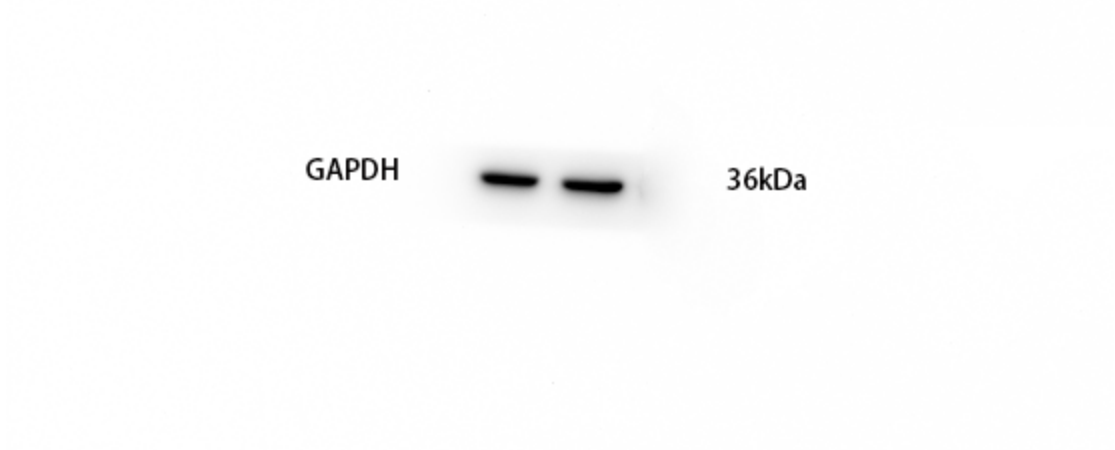

Figure6A

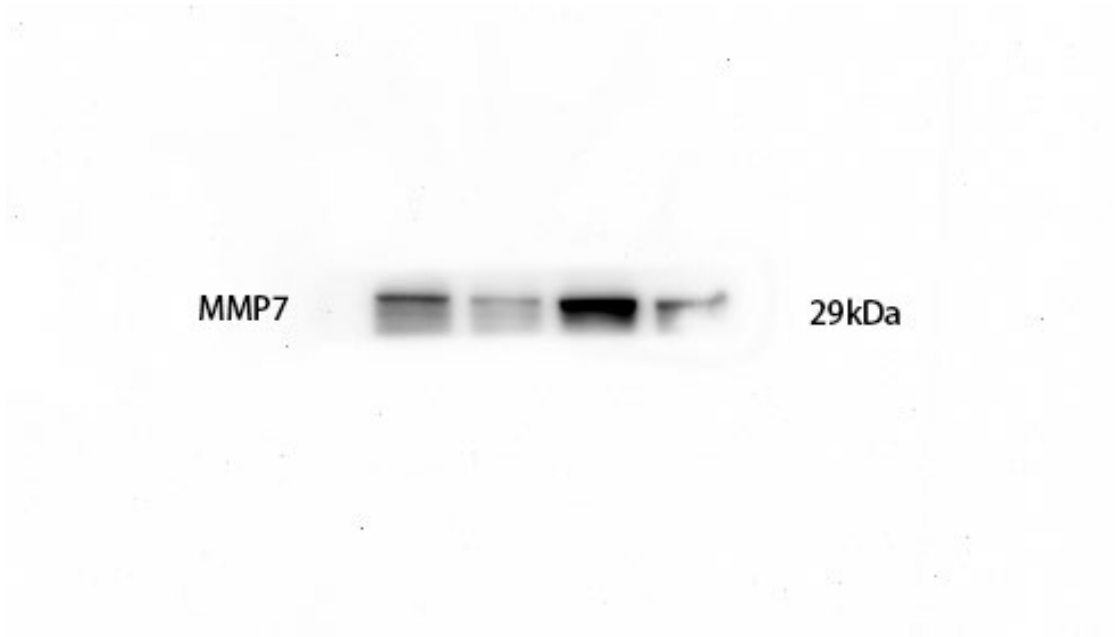

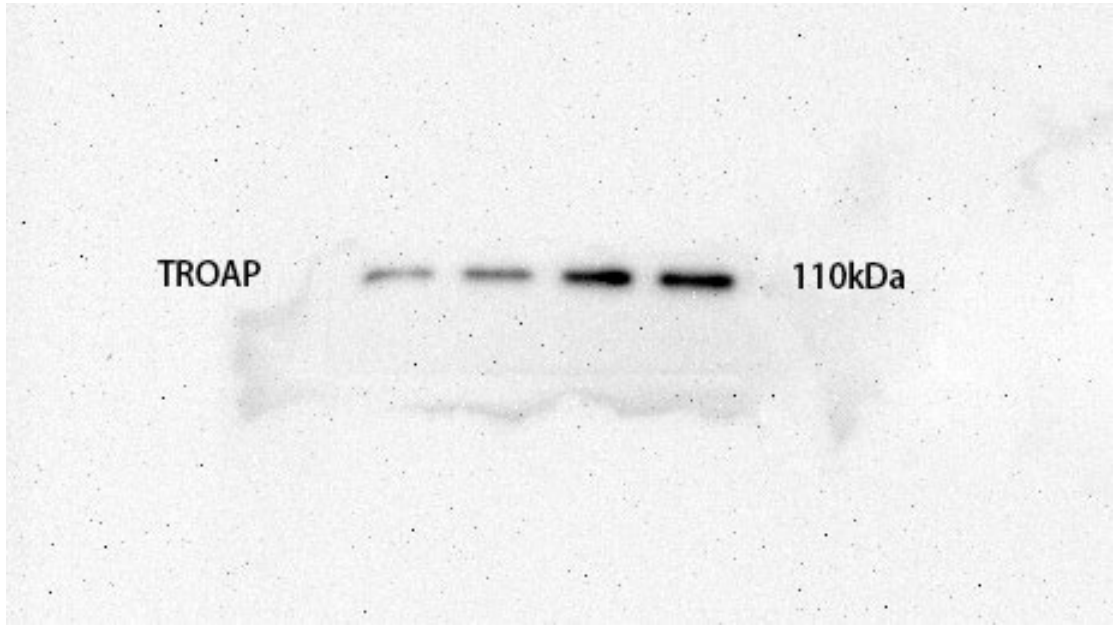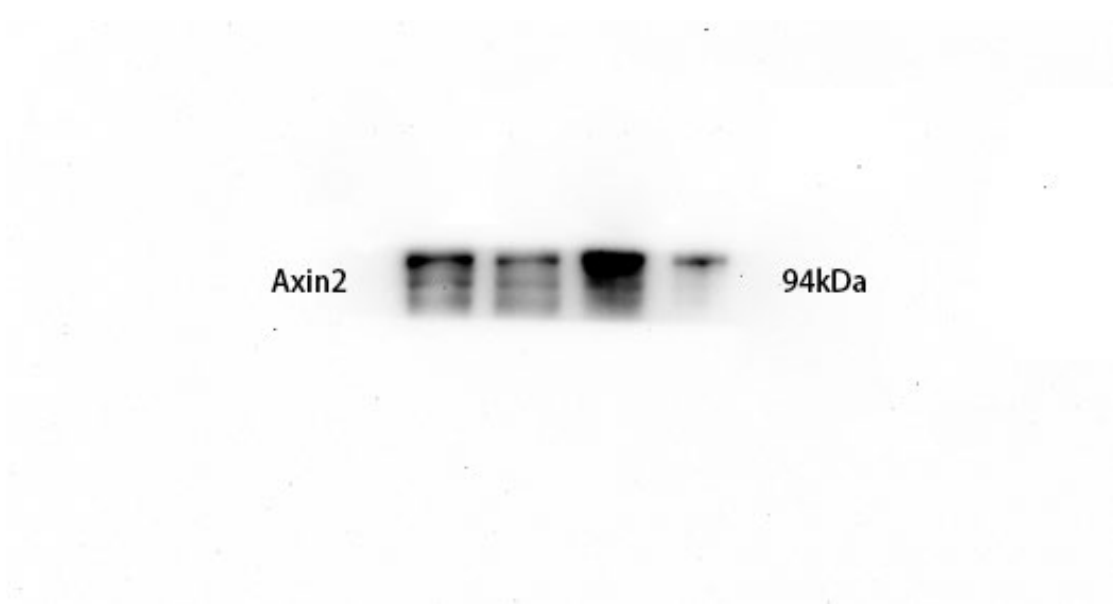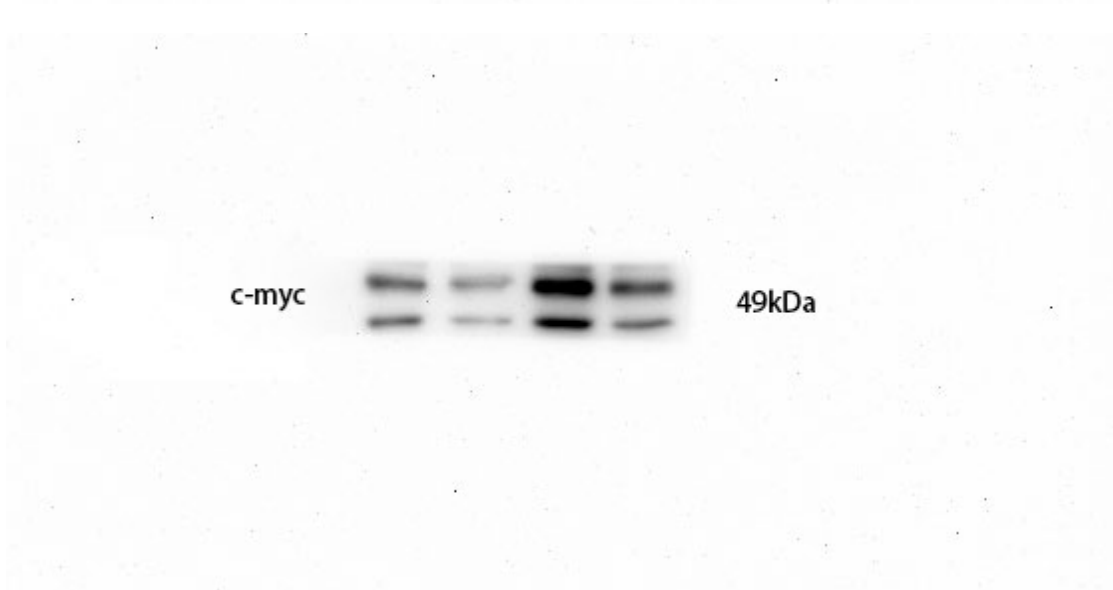

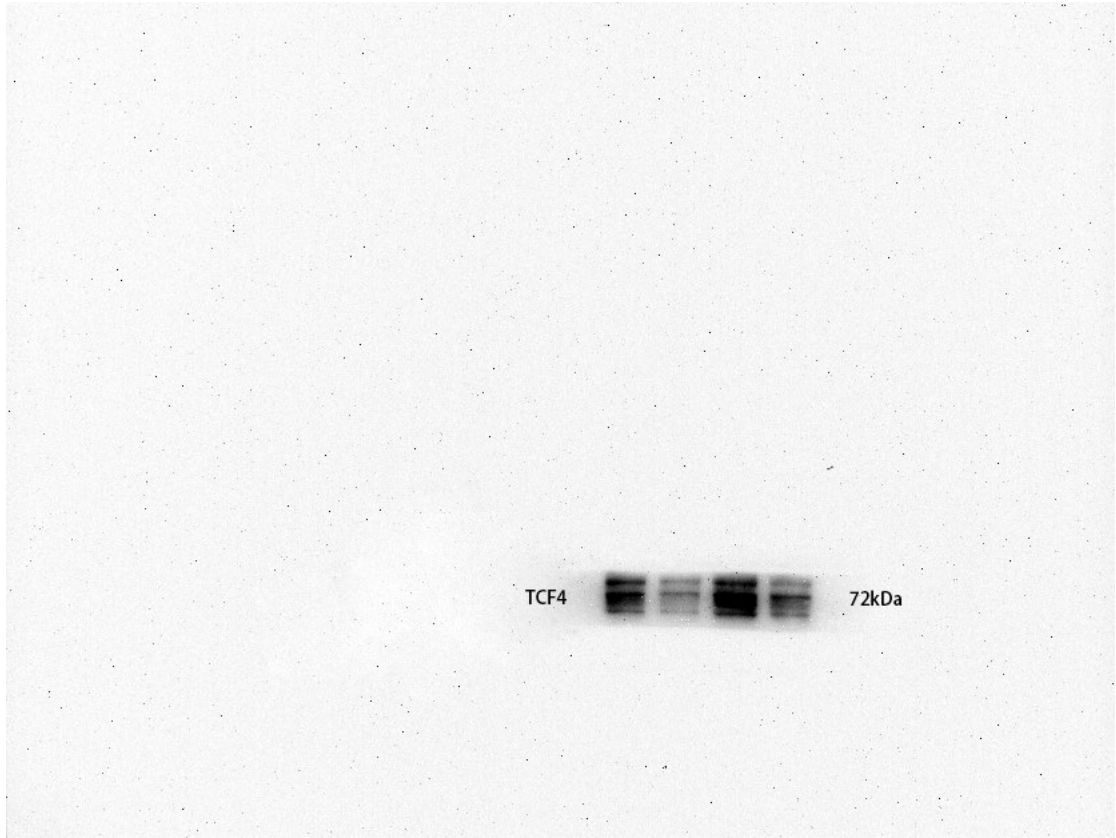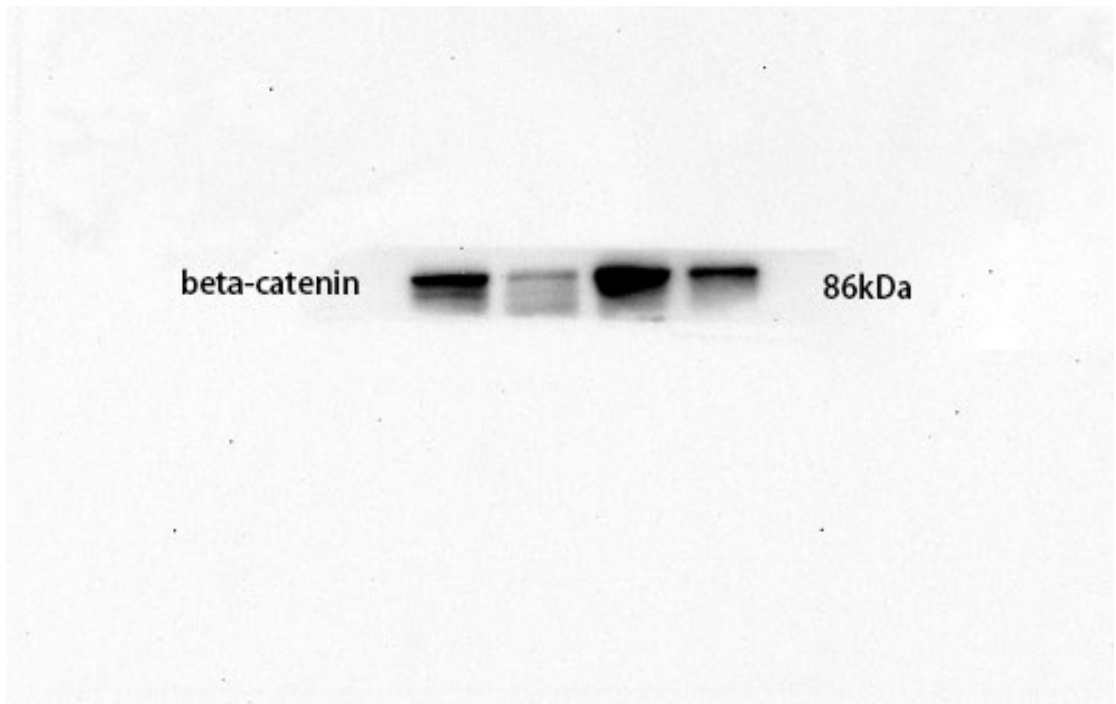

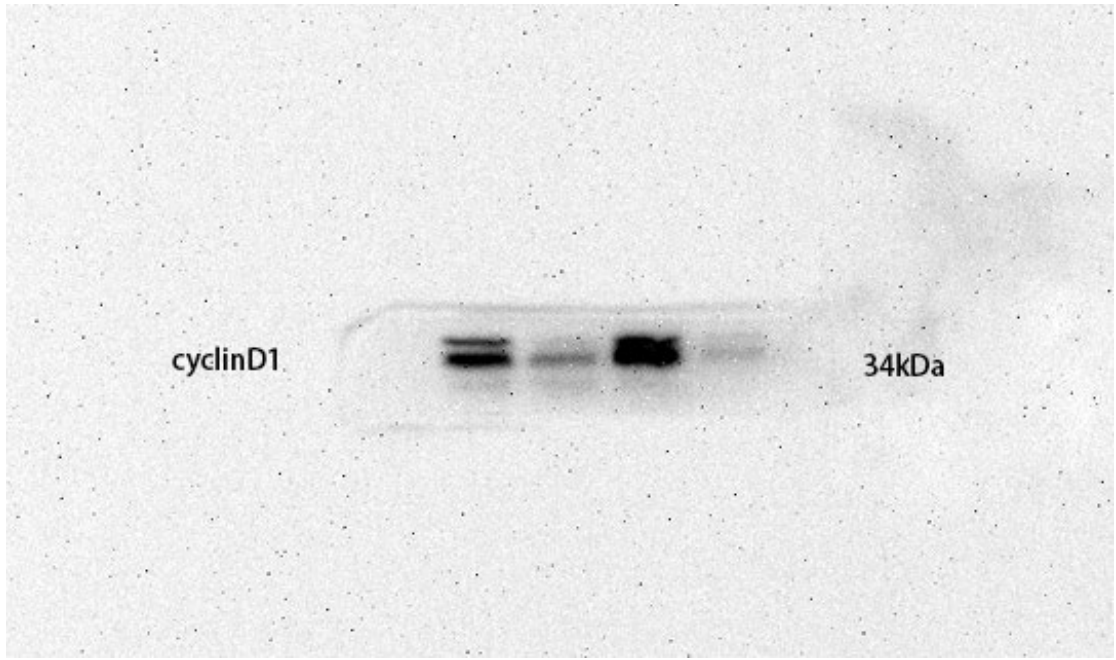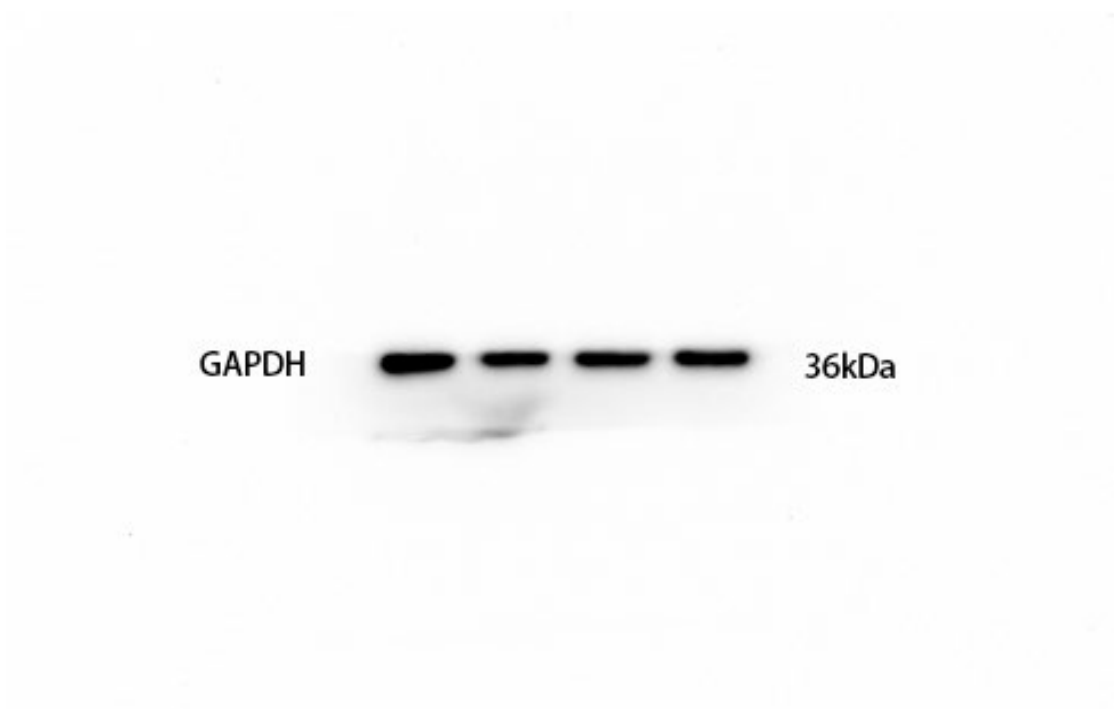

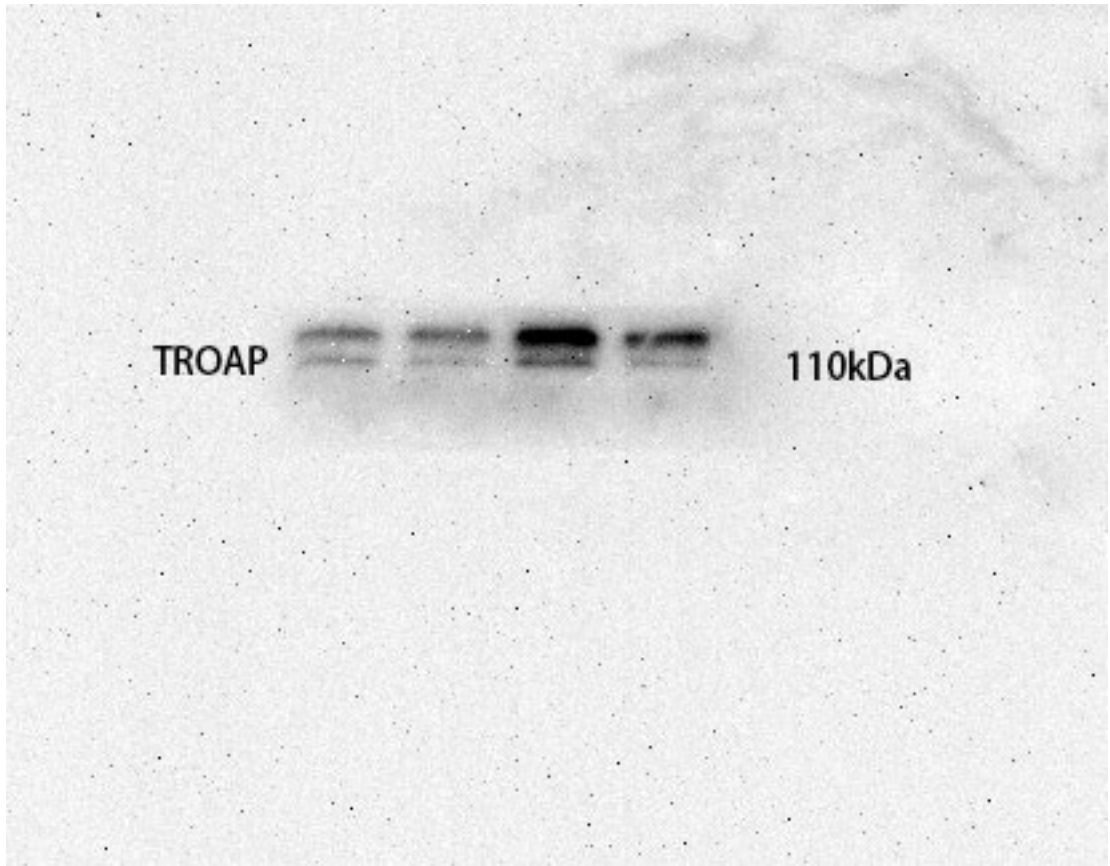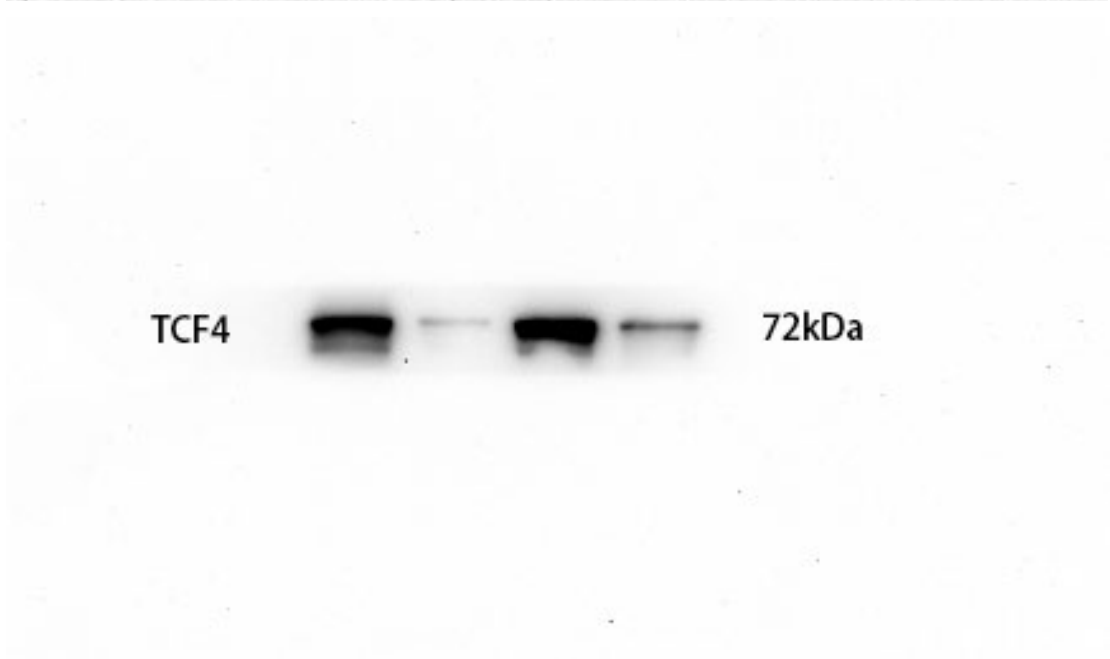



Axin2 94kDa

MMP7 29kDa

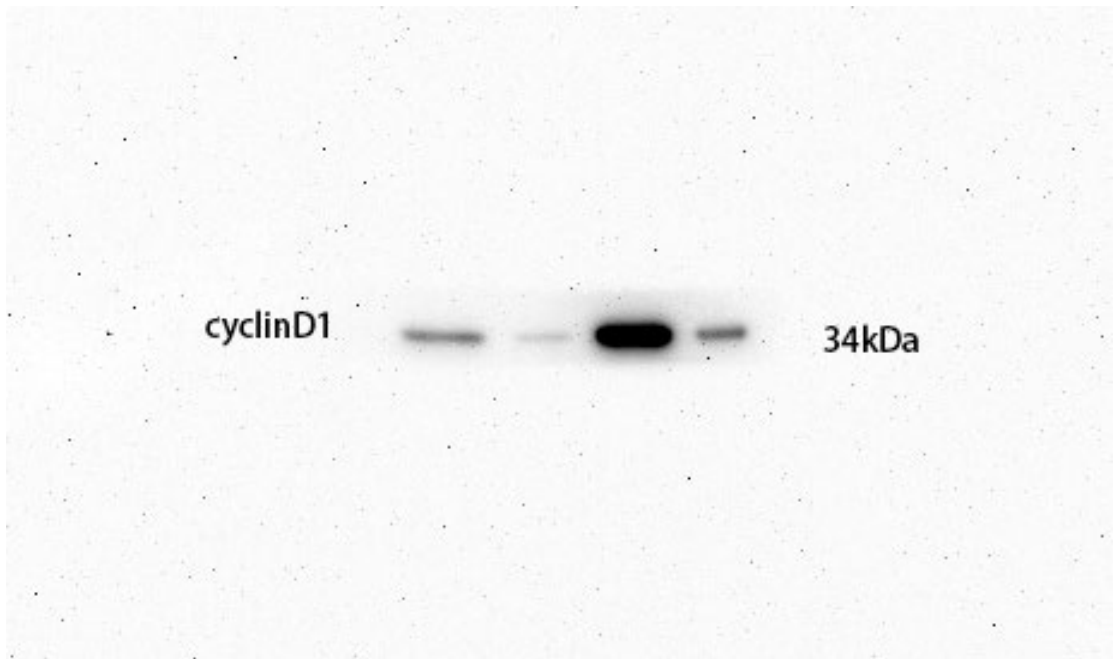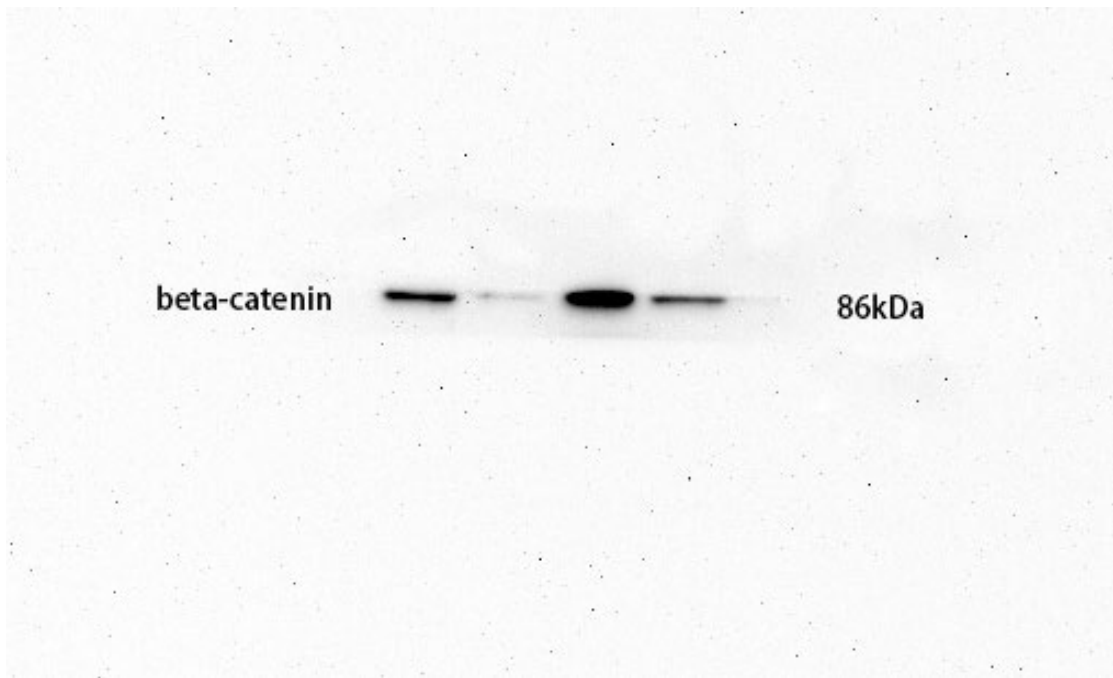

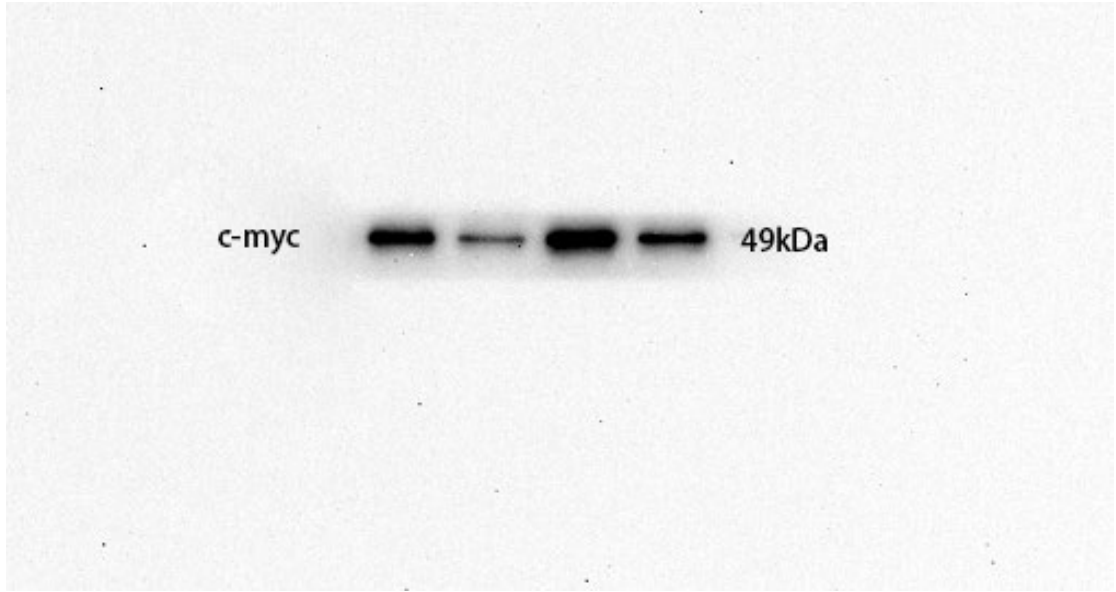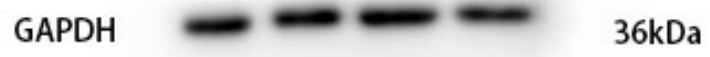

Supplement: CNS-27-1064-s001.pdf [file CNS-27-1064-s001.pdf]
